# Supplementary material for: Escinosomes: Safe and Successful Nanovesicles to Deliver Andrographolide by a Subcutaneous Route in a Mice Model of Oxaliplatin-Induced Neuropathy
Source: MDPI journal article supplement (doi:10.3390/pharmaceutics14030493), 2022-02-24
Supplement: s1 [file s1]

# Escinosomes: Safe and Successful Nanovesicles to Deliver Andrographolide by a Subcutaneous Route in a Mice Model of Oxaliplatin-Induced Neuropathy

Giulia Vanti <sup>1</sup>, Michela Capizzi <sup>1</sup>, Lorenzo Di Cesare Mannelli <sup>2</sup>, Elena Lucarini <sup>2</sup>, Maria Camilla Bergonzi <sup>1</sup>, Carla Ghelardini <sup>2</sup> and Anna Rita Bilia <sup>1,\*</sup>

<sup>1</sup> Department of Chemistry, University of Florence, Via Ugo Schiff 6, 50019, Florence, Italy; giulia.vanti@unifi.it (G.V.); michela.capizzi@stud.unifi.it (M.C.); mc.bergonzi@unifi.it (M.C.B.)

<sup>2</sup> Pharmacology and Toxicology Section, Department of Neuroscience, Psychology, Drug Research and Child Health (NEUROFARBA), University of Florence, Viale G. Pieraccini 6, 50139 Firenze, Italy; lorenzo.mannelli@unifi.it (L.D.C.M.); elena.lucarini@unifi.it (E.L.); carla.ghelardini@unifi.it (C.G.)

\* Correspondence: ar.bilia@unifi.it; Tel.: +39-0554-573709

**Table S1.** Effect of the acute administration of AG-loaded escinosomes on oxaliplatin-induced behavioral, autonomic, and neurological alterations by Irwin test. The Irwin test was performed 30 minutes following the acute administration of the treatments in oxaliplatin-treated rats. The signs were evaluated semi-quantitatively, according to the observer's personal scale (0 to +4, −4 to 0, or −4 to +4). Each value represents the mean ± SEM of 5 rats per group. \**p* < 0.05 vs vehicle + vehicle group.

| Treatments                        |                      |              |                         |                     |           |        |
|-----------------------------------|----------------------|--------------|-------------------------|---------------------|-----------|--------|
|                                   | Vehicle +<br>Vehicle | OX + Vehicle | OX + AG-Esc<br>10 mg/kg | OX + AG 10<br>mg/kg | OX + Esc  | Limits |
| Behavior                          |                      |              |                         |                     |           |        |
| Spontaneous activity              | 4 ± 0                | 2.3 ± 0.2*   | 2.1 ± 0.1               | 2.4 ± 0.2           | 2.0 ± 0.2 | 4–0    |
| Passivity                         | 0 ± 0                | 2.0 ± 0.1*   | 1.9 ± 0.2               | 2.0 ± 0.2           | 2.2 ± 0.1 | 0–4    |
| Cleaning                          | 4 ± 0                | 4 ± 0        | 4 ± 0                   | 4 ± 0               | 4 ± 0     | 4–0    |
| Curiosity                         | 4 ± 0                | 2.5 ± 0.2*   | 2.3 ± 0.1               | 2.3 ± 0.1           | 2.6 ± 0.2 | 4–0    |
| Reactivity                        | 4 ± 0                | 2.2 ± 0.1*   | 2.0 ± 0.2               | 2.3 ± 0.1           | 2.4 ± 0.1 | 4–0    |
| Vocalization                      | 0 ± 0                | 0 ± 0        | 0 ± 0                   | 0 ± 0               | 0 ± 0     | 0–4    |
| Central Nervous System Excitement |                      |              |                         |                     |           |        |
| Straub tail                       | 0 ± 0                | 0 ± 0        | 0 ± 0                   | 0 ± 0               | 0 ± 0     | 0–4    |
| Tremors                           | 0 ± 0                | 0 ± 0        | 0 ± 0                   | 0 ± 0               | 0 ± 0     | 0–4    |
| Convulsions                       | 0 ± 0                | 0 ± 0        | 0 ± 0                   | 0 ± 0               | 0 ± 0     | 4–0    |
| Movement                          |                      |              |                         |                     |           |        |
| Ataxia                            | 0 ± 0                | 0 ± 0        | 0 ± 0                   | 0 ± 0               | 0 ± 0     | 0–4    |
| Stereotypies                      | 0 ± 0                | 0 ± 0        | 0 ± 0                   | 0 ± 0               | 0 ± 0     | 0–4    |
| Straightening reflex              | 4 ± 0                | 4 ± 0        | 4 ± 0                   | 4 ± 0               | 4 ± 0     | 4–0    |
| Muscular Tone                     |                      |              |                         |                     |           |        |
| Physical strength                 | 4 ± 0                | 4 ± 0        | 4 ± 0                   | 4 ± 0               | 4 ± 0     | 4–0    |
| Palpebral reflex                  | 4 ± 0                | 4 ± 0        | 4 ± 0                   | 4 ± 0               | 4 ± 0     | 4–0    |
| Autonomic Signs                   |                      |              |                         |                     |           |        |
| Piloerection                      | 0 ± 0                | 2.6 ± 0.1*   | 2.7 ± 0.1               | 2.5 ± 0.1           | 2.5 ± 0.2 | 0–4    |
| Exophthalmos                      | 0 ± 0                | 0 ± 0        | 0 ± 0                   | 0 ± 0               | 0 ± 0     | 0–4    |
| Cyanosis                          | 0 ± 0                | 0 ± 0        | 0 ± 0                   | 0 ± 0               | 0 ± 0     | 0–4    |
| Flush                             | 0 ± 0                | 0 ± 0        | 0 ± 0                   | 0 ± 0               | 0 ± 0     | 0–4    |
| Pallor                            | 0 ± 0                | 2.8 ± 0.1*   | 2.7 ± 0.2               | 3 ± 0.1             | 2.7 ± 0.1 | 0–4    |
| Palpebral opening                 | 4 ± 0                | 4 ± 0        | 4 ± 0                   | 4 ± 0               | 4 ± 0     | 4–0    |

|                      |       |       |       |       |       |         |
|----------------------|-------|-------|-------|-------|-------|---------|
| Salivation           | 0 ± 0 | 0 ± 0 | 0 ± 0 | 0 ± 0 | 0 ± 0 | 0–4     |
| Lacrimation          | 0 ± 0 | 0 ± 0 | 0 ± 0 | 0 ± 0 | 0 ± 0 | 0–4     |
| Hypohyperthermia     | 0 ± 0 | 0 ± 0 | 0 ± 0 | 0 ± 0 | 0 ± 0 | – 4/+ 4 |
| <b>Toxicity</b>      |       |       |       |       |       |         |
| Immediate death      | 0 ± 0 | 0 ± 0 | 0 ± 0 | 0 ± 0 | 0 ± 0 | 0–4     |
| Delayed death (48 h) | 0 ± 0 | 0 ± 0 | 0 ± 0 | 0 ± 0 | 0 ± 0 | 0–4     |

OX = oxaliplatin; AG = andrographolide; Esc = unloaded escinosomes; AG-Esc = AG-loaded escinosomes
